# Supplementary material for: Development and validation of a method for precise dating of female puberty in laboratory rodents: The puberty ovarian maturation score (Pub-Score)
Source: PubMed Central journal article supplement (PMC5388887; doi:10.1038/srep46381), 2017-04-12
Supplement: srep46381-s1.pdf [file srep46381-s1.pdf]

## Development and validation of a method for precise dating of female puberty in laboratory rodents: The puberty ovarian maturation score (Pub-Score)

Francisco Gaytan<sup>1,2,3</sup>, Concepción Morales<sup>4</sup>, Silvia Leon<sup>1,2,3</sup>, Violeta Heras<sup>1,2,3</sup>, Alexia Barroso<sup>1,2,3</sup>, Maria S. Avendaño<sup>1,2,3</sup>, Maria J. Vazquez<sup>1,2,3</sup>, Juan M. Castellano<sup>1,2,3</sup>, Juan Roa<sup>1,2,3</sup> and Manuel Tena-Sempere<sup>1,2,3,5</sup>

<sup>1</sup>Department of Cell Biology, Physiology and Immunology, University of Córdoba; <sup>2</sup>Instituto Maimónides de Investigación Biomédica de Córdoba & Hospital Universitario Reina Sofía (IMIBIC/ HURS); <sup>3</sup>CIBER Fisiopatología de la Obesidad y Nutrición, Instituto de Salud Carlos III; and <sup>4</sup>Department of Pathology, University of Córdoba, 14004 Córdoba, Spain; and <sup>5</sup>FiDiPro Program, Department of Physiology, University of Turku, FIN-20520 Turku, Finland

**Short Title:** Dating puberty in rodents with Pub-Score

**Key Words:** Puberty, rat, mouse, ovary, cycle, follicle, corpus luteum, dating method

**Corresponding authors:** Francisco Gaytan ([bc1galuf@uco.es](mailto:bc1galuf@uco.es))

Manuel Tena-Sempere ([fi1tesem@uco.es](mailto:fi1tesem@uco.es))  
Department of Cell Biology, Physiology & Immunology  
Faculty of Medicine, University of Córdoba  
Avda. Menéndez Pidal s/n. 14004 Córdoba, SPAIN  
FAX: +34-957-218288

20

**Grant Support:** This work was supported by grants BFU2011-025021 and BFU2014-57581-P (Ministerio de Economía y Competitividad, Spain; co-funded with EU funds from FEDER Program); PIE-14/00005 (Flexi-Met; Instituto de Salud Carlos III, Ministerio de Sanidad, Spain) Project P12-FQM-01943 (Junta de Andalucía, Spain); and EU research contract REPROBESITY. CIBER Fisiopatología de la Obesidad y Nutrición is an initiative of Instituto de Salud Carlos III.

25

**Disclosure Statement:** The authors have nothing to disclose pertaining the contents of this work.

**Author Contributions:** F.G. and C.M. conducted the histological examinations and primarily defined the scoring method; S.L., V.H., A.B., M.S.A., M.J.V. & J.M.C. participated in the collection of samples and pubertal indices within the course of different experimental studies and discussed the data; J.R. participated in sample collection, discussed the data and prepared the figures; M.T.-S. evaluated and discussed all the data. F.G. & M.T.-S. defined the final scoring method and jointly wrote the paper. All authors revised the manuscript.

30

## Supplemental Figures

### 35 Supplemental Figure S1: Scatterplot presentation of Pub-score data

An illustrative example of Pub-score dating of female puberty is presented. A group of 10 mice, sampled for histological analysis of the ovaries at PND-40, were subjected to dating following the Pub-score method.

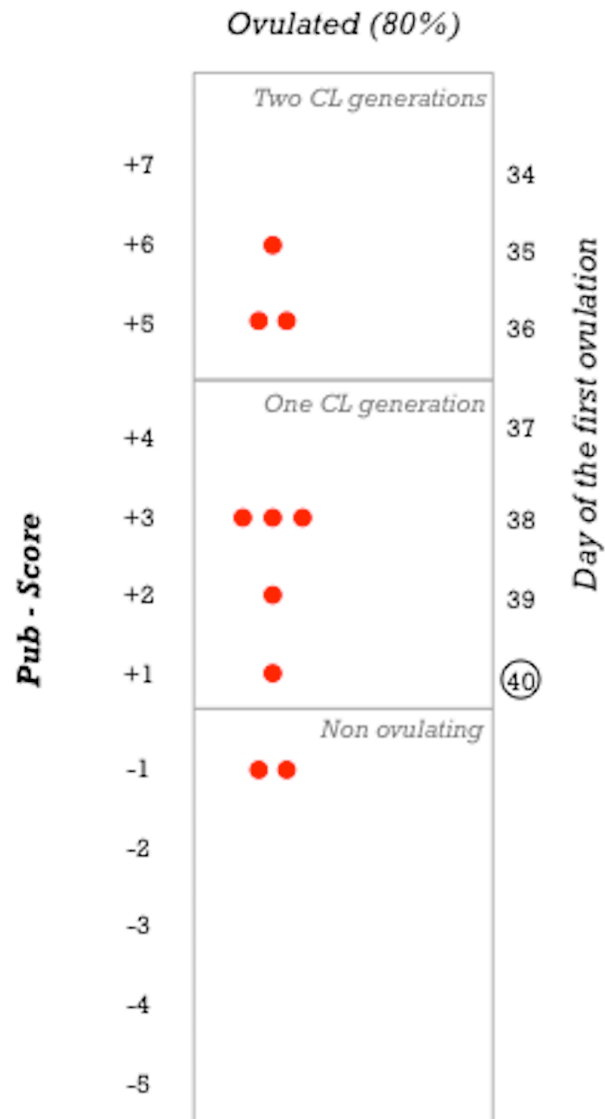

40 **Supplemental Figure S2:** *Time window for Pub-score dating of puberty in rodents*

Scheme depicting the time-window for accurate retrospective timing of female puberty, hallmarked by the occurrence of first ovulation, since the age of VO (as external sign of puberty) in rats and mice (*upper and lower panels, respectively*).

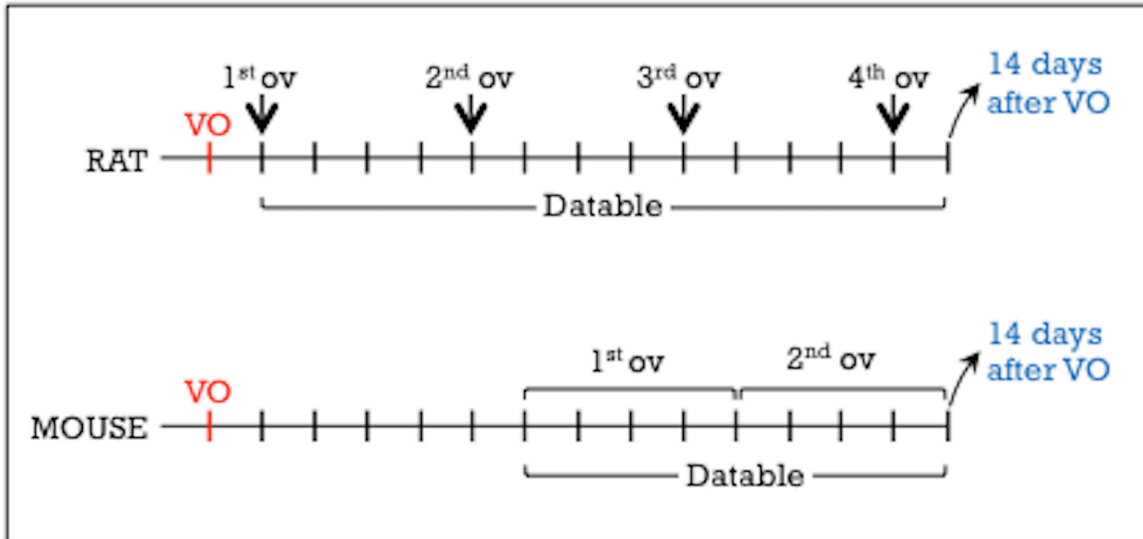

45
